# Supplementary material for: Electron and hole interactions with P, Z, and P:Z and the formation of mutagenic products by proton transfer reactions
Source: Royal Society of Chemistry journal article supplement (doi:10.1039/c9cp05367k), 2019-11-25
Supplement: c9cp05367k1.pdf [file c9cp05367k1.pdf]

## Supporting Information

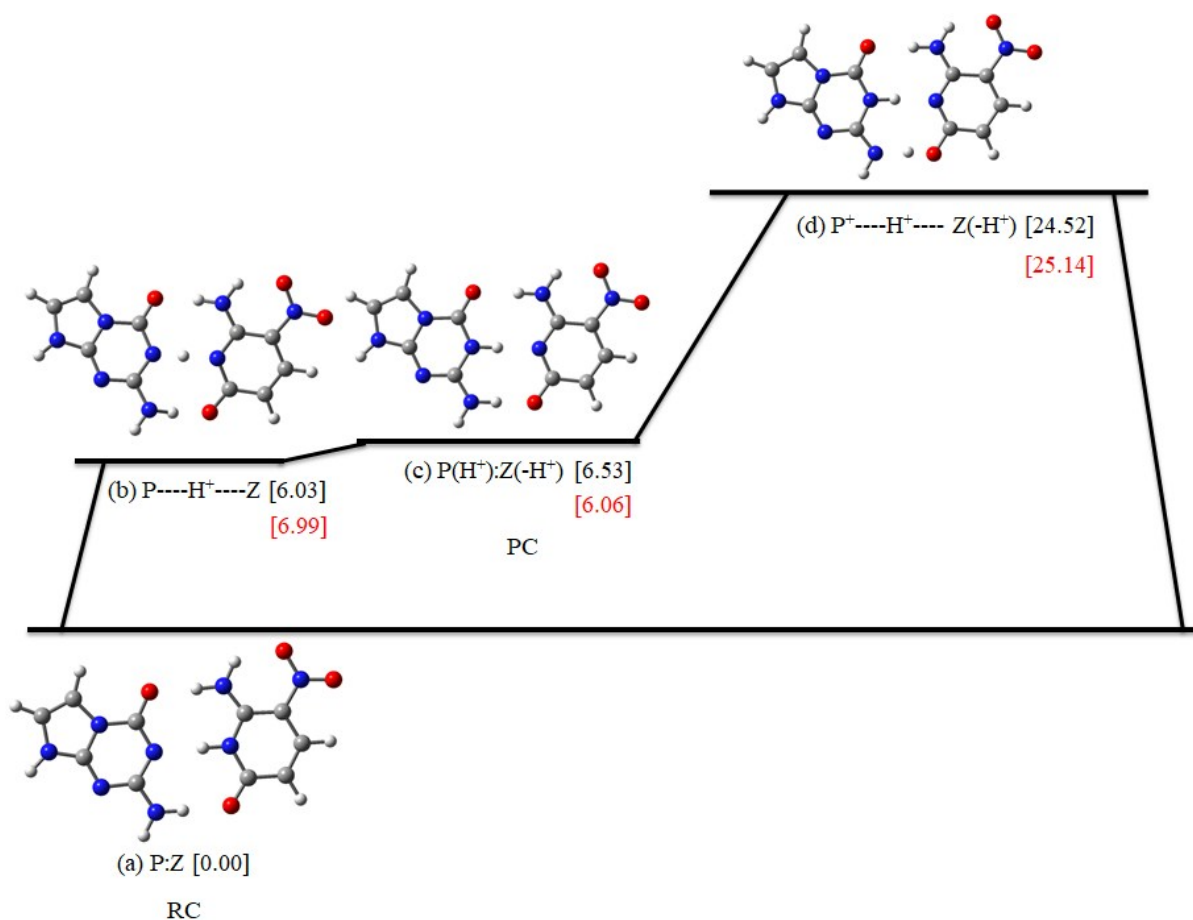

Fig. S1: Potential energy surface of the proton transfer reactions in the P:Z complex. The relative ZPE-corrected barrier energies and thermal energy-corrected Gibbs free energies (in red) are also shown.

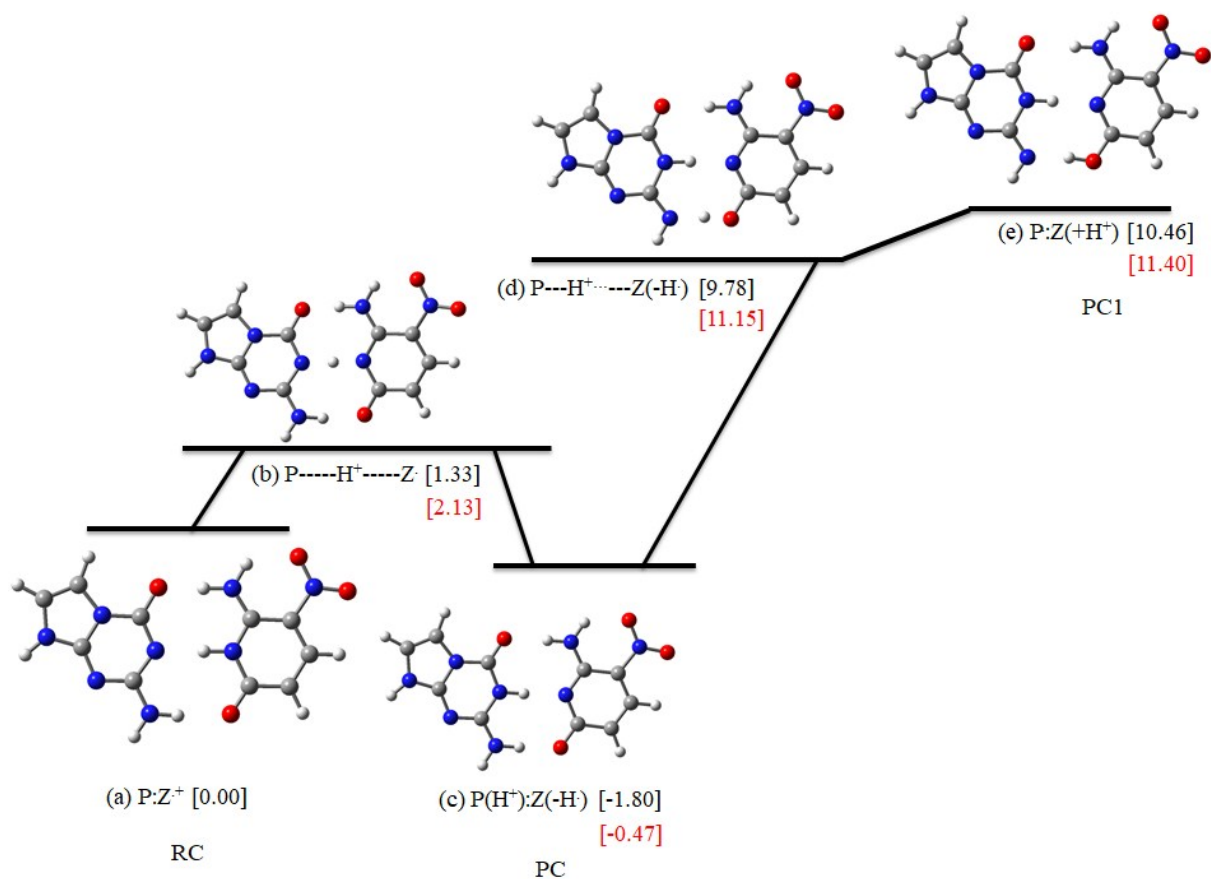

Fig. S2: Potential energy surface of the proton transfer reactions in the  $P:Z^+$  complex. The relative ZPE-corrected barrier energies and thermal energy-corrected Gibbs free energies (in red) are also shown.

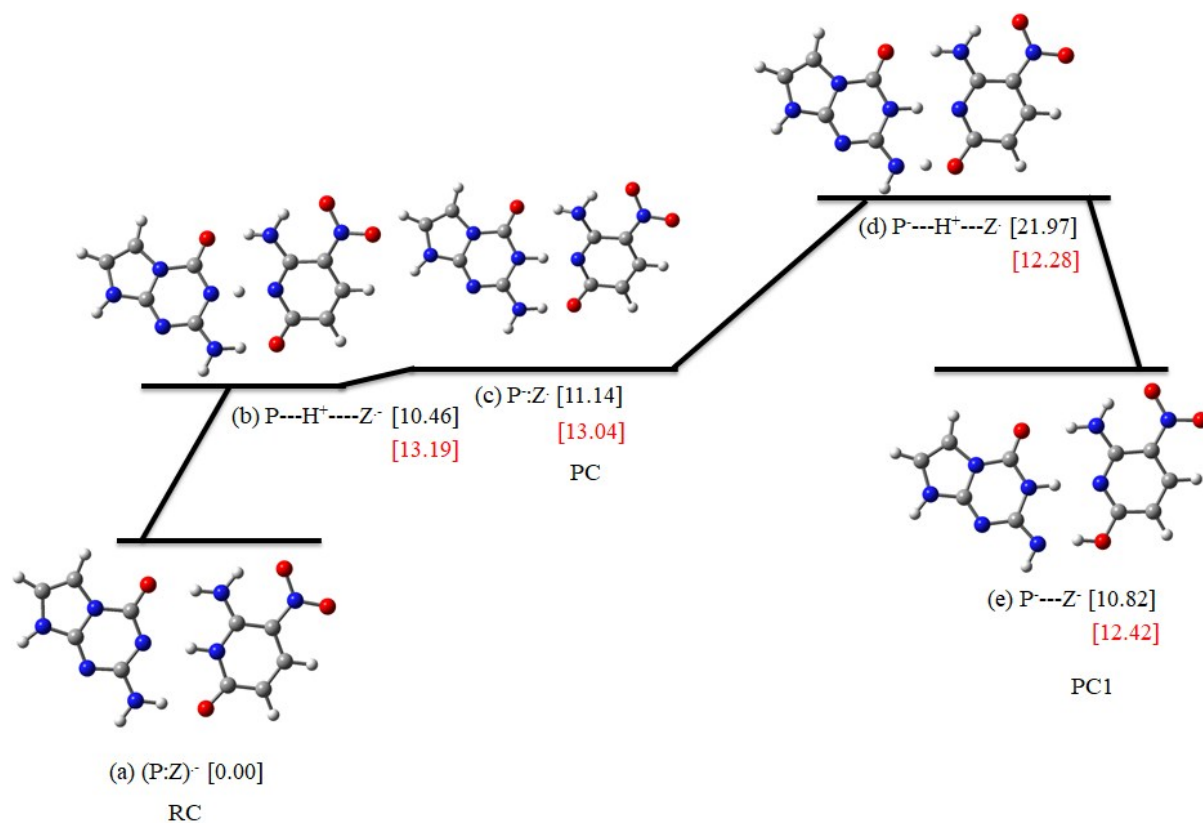

Fig. S3: Potential energy surface of the proton transfer reactions in the  $P:Z^-$  complex. The relative ZPE-corrected barrier energies and thermal energy-corrected Gibbs free energies (in red) are also shown.
